***De novo* indol-3-ylmethyl glucosinolate biosynthesis, and not long-distance transport, contributes to defence of Arabidopsis against powdery mildew**

1

2 Pascal Hunziker<sup>1,†</sup>, Hassan Ghareeb<sup>2</sup>, Lena Wagenknecht<sup>2</sup>, Christoph Crocoll<sup>1</sup>,

3 Barbara Ann Halkier<sup>1,‡</sup>, Volker Lipka<sup>2,3,4</sup> and Alexander Schulz<sup>1,‡</sup>

4

5 <sup>1</sup>DynaMo Center, Department of Plant and Environmental Sciences, University of

6 Copenhagen, Thorvaldsensvej 40, DK-1871 Frederiksberg C, Denmark

7 <sup>2</sup> Department of Plant Cell Biology, Albrecht-von-Haller Institute of Plant Sciences,

8 University of Goettingen, Julia-Lermontowa-Weg 3, D-37077 Göttingen, Germany

9 <sup>3</sup>Central Microscopy Facility of the Faculty of Biology and Psychology, University of

10 Goettingen, D-37077 Goettingen, Germany

11 <sup>4</sup>Department of Plant Cell Biology, Goettingen Center for Molecular Biosciences

12 (GZMB), University of Goettingen, D-37077 Goettingen, Germany

13

14 <sup>†</sup>Present address: Centre for Organismal Studies, Im Neuenheimer Feld 230,

15 Heidelberg University, D-69120 Heidelberg, Germany

16

17 <sup>‡</sup>Corresponding authors

18 e-mail addresses: [bah@plen.ku.dk](mailto:bah@plen.ku.dk), [als@plen.ku.dk](mailto:als@plen.ku.dk)

19 phone numbers: +45 35 33 33 42, +45 35 33 33 50

20 **Funding:**

21 This work was funded by the Danish National Research Foundation (grant DNRF99).

22 **Abstract:**

23 Powdery mildew is a fungal disease that affects a wide range of plants and reduces

24 crop yield worldwide. As obligate biotrophs, powdery mildew fungi manipulate living

25 host cells to suppress defence responses and to obtain nutrients. Members of the  
26 plant order Brassicales produce indole glucosinolates that effectively protect them  
27 from attack by non-adapted fungi. Indol-3-ylmethyl glucosinolates are constitutively  
28 produced in the phloem and transported to epidermal cells for storage. Upon attack,  
29 indol-3-ylmethyl glucosinolates are activated by CYP81F2 to provide broad-spectrum  
30 defence against fungi. How *de novo* biosynthesis and transport contribute to defence  
31 of powdery mildew-attacked epidermal cells is unknown. Bioassays and glucosinolate  
32 analysis indicate that GTR glucosinolate transporters are not involved in antifungal  
33 defence. Using quantitative live-cell imaging of fluorophore-tagged markers, we show  
34 that accumulation of the glucosinolate biosynthetic enzymes CYP83B1 and SUR1 is  
35 induced in epidermal cells attacked by the non-adapted barley powdery mildew  
36 *Blumeria graminis* f.sp. *hordei*. By contrast, glucosinolate biosynthesis is attenuated  
37 during interaction with the virulent powdery mildew *Golovinomyces orontii*.  
38 Interestingly, SUR1 induction is delayed during the *Golovinomyces orontii* interaction.  
39 We conclude that epidermal *de novo* synthesis of indol-3-ylmethyl glucosinolate  
40 contributes to CYP81F2-mediated broad-spectrum antifungal resistance and that  
41 adapted powdery mildews may target this process.

42

43 **Keywords:**

44 Glucosinolate; biosynthesis; transport; powdery mildew; Arabidopsis, epidermis

45

46 Glucosinolates (GLS) are sulphur- and nitrogen-containing  $\beta$ -thioglycosides that are  
47 characteristic of the Brassicales order and function in defence against herbivores and  
48 pathogens. GLS are hydrolysed by myrosinases yielding toxic catabolites such as  
49 isothiocyanates or nitriles (Grubb & Abel, 2006). GLS hydrolysis pathways that  
50 function in herbivore defence rely on the destruction of cells and subsequent passive  
51 mixture of compartmentalized GLS and myrosinase (Halkier & Gershenzon, 2006). An  
52 additional pathway that operates cell-autonomously in living cells mediates broad-  
53 spectrum antifungal defence (Pawel Bednarek et al., 2009; Lipka et al., 2005). In  
54 *Arabidopsis thaliana* (hereafter *Arabidopsis*), this pathway depends on the myrosinase  
55 PEN2 (Lipka et al., 2005). PEN2-mediated indole GLS hydrolysis yields catabolites  
56 different from those detected upon wounding or herbivory (Agerbirk, De Vos, Kim, &  
57 Jander, 2009; Pawel Bednarek et al., 2009; Paweł Bednarek et al., 2011; Burow et al.,  
58 2008; Kim, Lee, Schroeder, & Jander, 2008; Piślewska-Bednarek et al., 2018). The  
59 PEN2-dependent defence pathway has been shown to restrict growth of the non-  
60 adapted biotrophic pathogens *Blumeria graminis* f. sp. *hordei*, *Erysiphe pisi* and  
61 hemibiotrophic *Phytophthora infestans*, the adapted biotrophic pathogens  
62 *Golovinomyces orontii* and *Golovinomyces cichoracearum* and the necrotrophic fungi  
63 *Plectosphaerella cucumerina* and *Botrytis cinerea* (Pawel Bednarek et al., 2009; Lipka  
64 et al., 2005; J. Xu et al., 2016). PEN2 is constitutively expressed in epidermal cells  
65 and localized to peroxisomes and mitochondria where it is anchored to the membrane  
66 facing the cytosolic side (Fuchs et al., 2016; Lipka et al., 2005). Detailed studies  
67 revealed that mitochondrion-localized, but not peroxisome-localized PEN2 is required  
68 for non-host resistance towards *B. graminis* (Fuchs et al., 2016). Upon attack, PEN2-  
69 positive mitochondria are immobilized at the sites of attempted penetration (Fuchs et  
70 al., 2016). Moreover, the ER-anchored cytochrome P450 monooxygenase CYP81F2,

71 which is not detectable in unchallenged epidermal cells, is cell-autonomously induced  
72 and reveals focal accumulation at *B. graminis* penetration sites, where it co-localizes  
73 with PEN2 (Fuchs *et al.*, 2016). CYP81F2 catalyzes 4-hydroxylation of indol-3-  
74 ylmethyl GLS (I3M) and is required for synthesis of 4-methoxy-indol-3-ylmethyl GLS  
75 (4MOI3M), which is the relevant PEN2 substrate for production of antifungal  
76 compounds that effectively establish penetration resistance towards non-adapted  
77 powdery mildews (Pawel Bednarek *et al.*, 2009; Hematy *et al.*, 2019; Matern *et al.*,  
78 2019). I3M is the parent GLS of all modified indole GLS and produced from the  
79 precursor amino acid Trp via the GLS core structure synthesis pathway (Sønderby,  
80 Geu-Flores, & Halkier, 2010).

81 In the Arabidopsis ecotype Col-0, GLS core structure synthesis can be divided into  
82 two sub-pathways responsible for synthesis of Met-derived aliphatic and Trp-derived  
83 indole GLS, respectively (Sønderby *et al.*, 2010). Core structure synthesis of indole  
84 GLS starts with the conversion of Trp to indole-3-acetaldoxime catalysed by CYP79B2  
85 and CYP79B3, which function redundantly (Sønderby *et al.*, 2010). The aldoxime is  
86 then further processed by CYP83B1/SUR2, GSTFs, GGP1, SUR1, UGT74B1 and  
87 SOTs to produce I3M (Sønderby *et al.*, 2010). In contrast to SUR1, which is the only  
88 enzyme that converts S-alkyl-thiohydroximate into thiohydroximate and required for  
89 synthesis of both aliphatic and indole GLS, CYP83B1 is specific for indole GLS core  
90 structure synthesis. The equivalent reaction in the aliphatic sub-pathway is catalysed  
91 by CYP83A1. The two homologous CYP83s are both non-redundant and are therefore  
92 used as markers for the two sub-pathways (Naur *et al.*, 2003; Nintemann *et al.*, 2018).  
93 Both CYP83s are predominantly localized to the vasculature under normal growth  
94 conditions. Cellular localization in flower stalks revealed that CYP83B1 is exclusively  
95 localized to the phloem, while CYP83A1 was additionally found in the starch sheath

96 and in xylem parenchyma (Nintemann *et al.*, 2018). However, the localization of GLS  
97 synthesis in leaves has not been demonstrated on the cellular level yet. Presence of  
98 GLS synthesis in the vasculature as well as absence in the mesophyll and epidermis  
99 has been indicated by untargeted proteomics of dissected leaves (Svozil, Gruissem,  
100 & Baerenfaller, 2015). Despite the absence of GLS biosynthesis, high concentrations  
101 of GLS, particularly I3M, have been detected in the epidermis of leaves (O A Koroleva  
102 et al., 2000; Olga A Koroleva, Gibson, Cramer, & Stain, 2010; Madsen, Olsen, Nour-  
103 Eldin, & Halkier, 2014), indicating that GLS are transported from the site of synthesis  
104 (i.e. the vasculature) to the site of storage (i.e. epidermis).

105 To date, three plasma membrane-localized GLS transporters have been identified.  
106 GTR1/NPF2.10 and GTR2/NPF2.11 show proton-coupled import of both aliphatic and  
107 indole GLS into *Xenopus laevis* oocytes (Nour-Eldin *et al.*, 2012). By contrast, the  
108 recently identified GTR3/NPF2.9 shows high specificity for indole GLS (Jørgensen *et*  
109 *al.*, 2017). The current model suggests that GTRs affect seed loading, root exudation,  
110 intra-leaf distribution and transport of GLS between root, shoot and flower stalks via  
111 phloem loading and xylem retrieval (Andersen & Halkier, 2014; Andersen et al., 2013;  
112 Jørgensen et al., 2017; Madsen, Kunert, Reichelt, Gershenzon, & Halkier, 2015;  
113 Madsen et al., 2014; Nour-Eldin et al., 2012; D. Xu et al., 2016). This idea is supported  
114 by the vascular localization of GTR1-3 (Nour-Eldin et al., 2012; Wang & Tsay, 2011).

115 In addition, cell-to-cell transport of GLS has been proposed to follow the symplasmic  
116 route by diffusion through plasmodesmata (Andersen et al., 2013; Hunziker, Halkier,  
117 & Schulz, 2019; Madsen et al., 2014; Nintemann et al., 2018; D. Xu et al., 2016). While  
118 side chain modifications of I3M and subsequent hydrolysis upon pathogen attack are  
119 well studied, relatively little is known about how the plant orchestrates I3M  
120 biosynthesis and transport to defend epidermal cells.

121 Here, we show that I3M is *de novo* synthesized in epidermal cells upon attack by  
122 powdery mildews. Qualitative and quantitative bioimaging revealed accumulation of  
123 fluorophore-tagged CYP83B1 in epidermal cells attacked by the powdery mildews *B.*  
124 *graminis* or *G. orontii*. However, accumulation of 4MOI3M was solely observed during  
125 the incompatible interaction with *B. graminis*. No increase of 4MOI3M was observed  
126 during the compatible interaction with *G. orontii*, despite successful induction of  
127 CYP81F2, indicating insufficient core-structure synthesis. Supporting this hypothesis,  
128 we show that induction of SUR1 is delayed in response to *G. orontii* compared to *B.*  
129 *graminis* suggesting that SUR1 is a potential *G. orontii* effector target. Moreover, we  
130 demonstrate that GTR-mediated GLS transport is not required for defence against  
131 powdery mildews, highlighting the importance of cell-autonomous defence  
132 biochemistry in plant immunity.

133 **Material and methods**

134

135 **Plant growth and inoculations**

136 *Arabidopsis thaliana* (L.) Heynh. plants were grown in a walk-in climate chamber under  
137 short-day conditions (8 h photoperiod, 22°C day, 18°C night, 65% relative humidity  
138 and 150  $\mu\text{mol m}^{-2} \text{s}^{-1}$ ) for 4 weeks following vernalization at 4°C for 2 days. The  
139 Columbia-0 accession (Col-0) was used as wild-type. The following previously  
140 described T-DNA lines were used: *pen2-1* (Lipka *et al.*, 2005), *cyp81F2-2* (Pawel  
141 Bednarek *et al.*, 2009), *eds1-2* (Aarts *et al.*, 1998), *edr1* (Frye & Innes, 1998), *gtr1gtr2*  
142 (Nour-Eldin *et al.*, 2012) and *gtr1gtr2gtr3* (Jørgensen *et al.*, 2017). The following  
143 previously described transgenic lines were used: *pCYP81F2::CYP81F2-RFP* in  
144 *cyp81F2-2* (Fuchs *et al.*, 2016), *pGTR1::GTR1-YFP* in *gtr1gtr2* (Nour-Eldin *et al.*,  
145 2012), *pGTR2::GTR2-mOrange2* in *gtr1gtr2* (Nour-Eldin *et al.*, 2012),  
146 *pCYP83A1::CYP83A1-mVenus* (D. Xu *et al.*, 2016), *pCYP83B1::CYP83B1-mVenus*  
147 (D. Xu *et al.*, 2016) and *pSUR1::SUR1-mVenus* (D. Xu *et al.*, 2016). Positive T<sub>2</sub>  
148 transformants either heterozygous or homozygous for the *pCYP83A1::CYP83A1-*  
149 *mVenus*, *pCYP83B1::CYP83B1-mVenus* or *pSUR1::SUR1-mVenus* transgenes were  
150 selected by germination on solid half-strength Murashige and Skoog medium  
151 containing 1% (w/v) Suc and 100  $\mu\text{g ml}^{-1}$  hygromycin B. Seedlings were transferred to  
152 soil after 10 days. To produce conidiospores, *Blumeria graminis* f. sp. *hordei* isolate  
153 K1 was grown on *Hordeum vulgare* cv Ingrid (line I-10) for 10 to 14 d prior to  
154 inoculation. To produce conidiospores, *Golovinomyces orontii* was grown on the  
155 *Arabidopsis* accession Col-0 for 10 to 14 d prior to inoculation. Plants were  
156 randomized in trays and inoculated using a settling tower (Lipka *et al.*, 2005). For *G.*  
157 *orontii* inoculations, the settling tower was equipped with a mesh screen. Plants were

158 inoculated at noon (between 12.00 and 13.00 o'clock) and thereafter grown in reach-  
159 in growth chambers using the settings described in the previous paragraph.

160

## 161 **Bioassays**

162 For *B. graminis* penetration resistance assays, fifth true leaves were harvested at 72  
163 dpi and fixed in 80% ethanol, cleared for 10-14 d and subsequently subjected to aniline  
164 blue staining (150mM KH<sub>2</sub>PO<sub>4</sub>, pH 9.5 adjusted with KOH; 0.01% (w/v) aniline blue)  
165 overnight in the dark. Next, fungal structures were stained using an ethanolic solution  
166 of 0.6% Coomassie Brilliant Blue, washed in MiliQ-water and mounted in 50% glycerol.  
167 Samples were observed using a DM750 epifluorescence microscope with UV  
168 excitation and a long-pass UV filter set (Lipka *et al.*, 2005). For sporulation bioassays  
169 with *G. orontii*, five-six plants were pooled at 12 dpi. 5 µL mg<sup>-1</sup> MiliQ-water was added  
170 and spores were released by vortexing. 100 µL spore solution were mounted on a  
171 hemocytometer and counted using a DM750 microscope. Counts for each pool were  
172 technically replicated six times and the mean thereof was used as single biological  
173 replicate.

174

## 175 **Confocal microscopy and quantification of fluorescence**

176 Fifth true leaves were harvested using forceps and mounted in a Calcofluor white  
177 solution (Fluorescent brightener 28). Samples were observed using a Leica TCS SP5  
178 (Leica Microsystems, Wetzlar, Germany) equipped with argon and diode lasers. An  
179 HCX PL APO CS 20.0x0.70 DRY UV objective was used throughout the study.  
180 Scanning speed was set to 400 Hz in bidirectional mode. Zoom was set to 3.6 fold. Z-  
181 stack volume was set to 11 µm imaged in 1µm steps (11 steps/stack) starting on top  
182 of the adaxial epidermis with the conidiospore in focus. Sequential scanning between



183 stacks was applied to reduce photobleaching. The first sequence was used to image  
184 fluorescent protein fusions using the argon laser with 20% pre-set power and a line  
185 average of 3. The 514 nm laser line with an AOBS setting of 12% was used for  
186 excitation of mVenus and mOrange2. mVenus emission light was recorded using a  
187 HyD hybrid detector with a detection window of 520-550 nm and a gain of 187 V.  
188 mOrange2 emission light was recorded using a HyD hybrid detector with a detection  
189 window of 520-575 nm and a gain of 187 V. Chlorophyll autofluorescence was  
190 recorded using a photomultiplier tube and a detection window of 681-732 nm and a  
191 gain of 561 V. The 561 nm laser line with an AOBS setting of 15% was used for  
192 excitation of RFP. RFP emission light was recorded using a HyD hybrid detector with  
193 a detection window of 580-620 nm and a gain of 277 V. Chlorophyll autofluorescence  
194 was recorded using a photomultiplier tube with a detection window of 678-731 nm and  
195 a gain of 553 V. The second sequence was used to image the Calcofluor white signal  
196 using the 405 nm diode UV laser with an AOBS setting of 4-5%. Calcofluor white  
197 emission light was recorded with a detection window of 420-460 nm and 98-296 V  
198 gain. The HyD detectors were used in standard acquisition mode. For quantification  
199 of mean fluorescence intensities, z-stacks were maximum projected and three lines  
200 were manually drawn across attacked cells to obtain three representative  
201 measurements. The mean of the three measurements was used for further analysis.  
202 ImageJ (version 2.0.0-rc-68/1.52i, <http://imagej.net>) was used for fluorescence  
203 quantification. Fixation and ClearSee treatment were performed as previously  
204 described.

205

206 **Desulfo-glucosinolate analysis by LC-MS**

207 Entire fifth true leaves of 4-week-old plants were gently harvested by detachment at  
208 the proximal part of the petiole using fine forceps and immediately frozen in liquid  
209 nitrogen. Subsequently, samples were lyophilized for 24 hours, ground into fine  
210 powder and extracted in 85% methanol containing 50  $\mu$ M *p*-hydroxybenzyl  
211 glucosinolate as internal standard as previously described (Andersen *et al.*, 2013).  
212 Samples were 10-fold diluted with deionized water and subjected to analysis by LC-  
213 MS as previously described (Crocoll, Halkier, & Burow, 2016; Jensen, Jepsen, Halkier,  
214 Kliebenstein, & Burow, 2015).

215

### 216 **Statistical analysis**

217 ANOVA analyses were performed in R version 3.4.2 (2017-09-28; [https://www.R-](https://www.R-project.org)  
218 [project.org](https://www.R-project.org)).

## 219 **Results**

220

### 221 **GTRs are not involved in defence against *B. graminis* and *G. orontii***

222 To explore the role of transmembrane GLS transport in defence against adapted and  
223 non-adapted powdery mildews, we investigated whether accumulation of GTR1 and  
224 GTR2 – the *GTRs* expressed in aboveground tissue – is induced upon attack by non-  
225 adapted *B. graminis* or virulent *G. orontii*. As the hypothesized pathogen-induced  
226 expression of *GTR1* and/or *GTR2* is assumed to occur locally – if not cell-  
227 autonomously – and restricted to the epidermis, we used live-cell imaging of protein-  
228 fluorophore fusions instead of e.g. qualitative PCR that might not be able to detect  
229 perturbations in a small subpopulation of attacked epidermal cells when sampling  
230 whole leaves. We inoculated transgenic plants homozygous for *GTR1-YFP* or *GTR2-*  
231 *mOrange2* fluorophore fusions (*GTR1-YFP/gtr1gtr2* and *GTR2-mOrange2/gtr1gtr2*,  
232 respectively) and examined their expression at individual interaction sites on the fifth  
233 true leaf of 4-week-old plants. Both constructs are expressed under the control of their  
234 endogenous 5' regulatory sequences in the *gtr1gtr2* double knockout background  
235 (Nour-Eldin *et al.*, 2012). We imaged plants at 24 and 48 hours post inoculation (hpi)  
236 for several reasons: Firstly, pathogen induction of CYP81F2 has been reported to  
237 reach a maximum at 6 to 24 hpi with *B. graminis* and decrease to basal levels at 48  
238 hpi (Fuchs *et al.*, 2016). Secondly, 4MOI3M levels have been reported to be  
239 unaffected at 24 hpi with *G. orontii*, but showed two-fold induction at 48 hpi (Schön *et*  
240 *al.*, 2013). Thirdly, the two time points allow to capture abundant attempted penetration  
241 events for both pathogens at 24 hpi and failure or success of penetration for *B.*  
242 *graminis* and *G. orontii*, respectively, at 48 hpi. The fluorescence signals of GTR1-  
243 YFP and GTR2-mOrange2 were close to the detection limit in unchallenged epidermal

244 cells at both time points (Fig. 1), but showed prominent signals in the vasculature of  
245 unchallenged plants (Fig. S1). No pathogen-induced accumulation was observed at  
246 24 hpi and 48 hpi with either *B. graminis* or *G. orontii* (Fig. 1), as also evident from  
247 quantitative analysis of mean fluorescence intensities (Fig. S2 and Fig. S3). Hence,  
248 accumulation of neither GTR1 nor GTR2 is induced upon attack by *B. graminis* or *G.*  
249 *orontii*.

250 To validate our results, we conducted quantitative bioassays using *B. graminis* and *G.*  
251 *orontii* on *gtr* knockout mutants by inoculating GLS transporter mutants with the  
252 virulent *G. orontii* and quantifying the number of spores produced at 12 days post  
253 inoculation (Fig. 2a). Loss-of-function mutants of *ENHANCED DISEASE*  
254 *RESISTANCE1 (EDR1)* and *ENHANCED DISEASE SUSCEPTIBILITY1 (EDS1)*  
255 significantly decrease and increase spore production of *G. orontii*, respectively (Aarts  
256 et al., 1998; Frye & Innes, 1998), and were therefore included as controls. As  
257 expected, spore production on *edr1* was significantly decreased while being increased  
258 on *eds1-2* compared to wild-type. On *pen2-1* mutants, *G. orontii* produced significantly  
259 more spores compared to wild-type and reached *eds1-2* levels. Hence, PEN2-  
260 mediated hydrolysis of GLS contributes to basal resistance against virulent *G. orontii*.  
261 When we examined the conidiospore production in double and triple mutants of the  
262 functionally redundant GTR1, GTR2 and GTR3 transporters (Jørgensen et al., 2017),  
263 we observed that the number of spores on *gtr1gtr2* and *gtr1gtr2gtr3* were not  
264 significantly different from wild-type. Compared to *pen2-1*, both double and triple *gtr*  
265 mutants showed significantly lower spore numbers. As GTR-mediated import of GLS  
266 from the apoplast would occur upstream of PEN2-mediated GLS hydrolysis, we  
267 expected a *pen2*-like phenotype and thus conclude that GTR1, GTR2 and GTR3 are  
268 not required for defence against *G. orontii*. Consistent with these findings, *GTR1-*

269 *YFP/gtr1gtr2* (equivalent to *gtr2* single mutants) and *GTR2-mOrange2/gtr1gtr2*  
270 (equivalent to *gtr1* single mutants) showed no enhanced susceptibility towards *G.*  
271 *orontii*.

272 When we challenged the double and triple *gtr* mutants with *B. graminis* and scored  
273 interaction sites at 72 hpi, the number of papillae, encased haustoria and epidermal  
274 cells undergoing cell death on *B. graminis*-inoculated *gtr1gtr2*, *GTR1-YFP/gtr1gtr2*,  
275 *GTR2-mOrange2/gtr1gtr2* and *gtr1gtr2gtr3* were not significantly different from wild-  
276 type at 72 hpi (Fig. 2b). Compared to wild-type and *gtr* mutants, *pen2-1* plants showed  
277 significantly more encased haustoria and cell death while the number of efficient  
278 papillae significantly decreased, indicating that more penetration attempts were  
279 successful. Moreover, we observed secondary hyphae at conidia with encased  
280 haustoria (both with and without cell death). These results suggest that GLS  
281 transporters are not required for penetration resistance towards *B. graminis*. In  
282 conclusion, GTR-mediated GLS transport is not involved in defence against *B.*  
283 *graminis* and *G. orontii*.

284

### 285 ***B. graminis* and *G. orontii* induce accumulation of key enzymes of indole GLS** 286 **core structure synthesis in the epidermis**

287 Assuming that epidermal cells challenged by powdery mildews do not receive GLS via  
288 transport, they must either remobilize preformed I3M intracellularly or synthesize it *de*  
289 *novo* via the core structure pathway. To test whether I3M is synthesized *de novo*, we  
290 inoculated transgenic plants expressing *pCYP83A1::CYP83A1-mVenus* or  
291 *pCYP83B1::CYP83B1-mVenus* with *B. graminis* and *G. orontii* and subsequently  
292 analyzed the accumulation of the fusion proteins using CLSM (Fig. 3). Plants  
293 expressing *pCYP81F2::CYP81F2-RFP* were included as a positive control for

294 induction of I3M-to-4MOI3M conversion. The fluorescence signals of fusion proteins  
295 were below the detection limit in epidermal cells of unchallenged plants (Fig. 3a).  
296 However, the markers for core structure synthesis were detectable in vascular  
297 parenchyma cells of cleared leaves (Fig. S1) and transverse sections of non-cleared  
298 leaves (data not shown) of unchallenged plants. Upon inoculation with *B. graminis* or  
299 *G. orontii*, we observed prominent mVenus fluorescence in attacked epidermal cells  
300 of three independent *CYP83B1-mVenus*-expressing plant lines, while mVenus  
301 fluorescence in three independent *CYP83A1-mVenus* lines was below the detection  
302 limit (Fig. 3a). Quantification of mean fluorescence intensities in attacked cells  
303 revealed a statistically significant increase of the CYP83B1-mVenus signal at both 24  
304 hpi and 48 hpi with both pathogens (Fig. 3b). Hence, both *B. graminis* and *G. orontii*  
305 induce the accumulation of key enzymes involved in indole GLS core structure  
306 synthesis in the epidermis.

307

### 308 ***B. graminis*, but not *G. orontii*, triggers 4MOI3M accumulation**

309 To test whether both pathogens elicit the accumulation of GLS at the time points used  
310 in this study, we challenged wild-type plants with *B. graminis* or *G. orontii* and analyzed  
311 the GLS concentration in the fifth true leaf at 24 hpi and 48 hpi by LC-MS (Fig. 4 and  
312 S5). 4MOI3M levels were significantly induced in response to *B. graminis* at both time  
313 point (Fig. 4). By contrast, 4MOI3M levels were not significantly induced upon  
314 treatment with *G. orontii*. Hence, non-adapted *B. graminis*, but not virulent *G. orontii*  
315 triggers 4MOI3M accumulation. Total indole GLS did not reveal significant changes in  
316 response to the pathogen treatments, indicating a balance among individual indole  
317 GLS (Fig. 4). However, wild-type plants challenged by *G. orontii* revealed the overall  
318 highest indole GLS levels at 24 hpi and overall lowest levels at 48 hpi, reflecting a

319 significant decrease of total indole GLS between 24 hpi and 48 hpi. This shift was  
320 reflected by I3M, which also showed a significant difference between 24 hpi and 48  
321 hpi with *G. orontii*. Hence, *G. orontii* might trigger CYP81F2-catalyzed I3M-to-4MOI3M  
322 conversion and subsequent PEN2-mediated 4MOI3M hydrolysis, leading to a slight  
323 depletion of the I3M pool without significant accumulation of 4MOI3M. However,  
324 absence of complete I3M depletion indicates that most I3M is not accessible to ER-  
325 anchored CYP81F2 and mitochondria-anchored PEN2. Moreover, as induction of  
326 CYP81F2 accumulation is similar between *B. graminis* and *G. orontii* treatments (Fig.  
327 3), we conclude that absence of 4MOI3M accumulation in response to *G. orontii*  
328 results from insufficient indole GLS core structure synthesis in the epidermis.

329 To gain further insight into pathogen-induced perturbations of indole GLS metabolism,  
330 we measured GLS in *cyp81F2-2* knock-out mutants that show loss of penetration  
331 resistance to *B. graminis* and enhanced susceptibility to *G. orontii*. 4MOI3M levels  
332 were significantly lower compared to wild-type independent of the treatment,  
333 confirming that CYP81F2 is the major CYP81F responsible for pathogen-induced  
334 4MOI3M accumulation as well as for the establishment of basal 4MOI3M levels in  
335 whole leaves (Fig. 4). Total indole GLS levels were not significantly different in  
336 *cyp81F2-2* knock-out mutant and wild-type plants except for the *G. orontii* samples at  
337 48 hpi, in which the knock-out mutant displayed higher levels than wild-type.  
338 Consequently, the decrease of total indole GLS levels observed in wild-type plants  
339 inoculated with *G. orontii* between 24 and 48 hpi was not detectable in the mutant. As  
340 expected for *cyp81F2-2*, I3M levels were overall higher than wild-type, but did not  
341 change dramatically in response to the treatment. This indicates that I3M is directly  
342 converted to 4MOI3M in the wild-type and that a threshold I3M concentration might  
343 exist that leads to feedback inhibition of indole GLS synthesis. To sum up,

344 incompatible interactions with the non-adapted powdery mildew *B. graminis* appear to  
345 timely induce *de novo* I3M synthesis followed by CYP81F2-dependent production of  
346 4MOI3M. In marked contrast, compatible interactions with the virulent pathogen *G.*  
347 *orontii* appear to correlate with reduced 4MOI3M synthesis, which may explain  
348 compatibility.

349

350 **Pathogen-induced epidermal SUR1 accumulation is absent in response to *G.***  
351 ***orontii* infection**

352 As 4MOI3M accumulation is absent at 24 hpi and 48 hpi with *G. orontii* despite  
353 prominent induction of *CYP83B1* and *CYP81F2* gene expression in the attacked  
354 epidermal cells as compared to those attacked by *B. graminis*, we set out to identify  
355 genes involved in indole GLS biosynthesis that might be perturbed in response to *G.*  
356 *orontii*. Among the biosynthetic enzymes, the C-S lyase SUR1 catalyzing the  
357 conversion of S-alkyl-thiohydroximates to thiohydroximates represented the most  
358 promising candidate for two reasons: First, the SUR1-catalyzed reaction is the only  
359 step in indole GLS synthesis lacking functional redundancy (Sønderby *et al.*, 2010).  
360 Second, loss-of-function mutations of *SUR1* results in “pathway abortion” that  
361 manifests itself in the irreversible and spontaneous, intramolecular cyclization of the  
362 SUR1 substrate S-alkyl-thiohydroximate (Geu-Flores *et al.*, 2009, 2011; Mikkelsen,  
363 Naur, & Halkier, 2004). To elucidate the dynamics of *SUR1* expression and localization  
364 in response to *G. orontii*, we inoculated three independent lines expressing *SUR1-*  
365 *mVenus* under the control of its endogenous promoter sequence and subsequently  
366 analyzed SUR1 accumulation by CLSM (Fig. 5). As an additional control, we  
367 inoculated the same set of fluorophore lines with *B. graminis* in parallel. SUR1-  
368 *mVenus* fluorescence was below the detection limit in the adaxial epidermis of



369 unchallenged plants (Fig. 5a, while showing prominent fluorescence in vascular  
370 parenchyma cells as revealed by CLSM using cleared leaves (Fig. S1) and transverse  
371 sections of petioles (data not shown). Following inoculation with *G. orontii*, no SUR1-  
372 mVenus fluorescence was observed in epidermal cells at 24 hpi while weak  
373 fluorescence was detected at 48 hpi. By contrast, weak SUR1-mVenus fluorescence  
374 was observed at both 24 hpi and 48 hpi with *B. graminis*. Quantification of mean  
375 fluorescence intensities in attacked cells showed no significant differences for SUR1-  
376 mVenus accumulation in response to *G. orontii* (Fig. 5b. By contrast, SUR1-mVenus  
377 signal was significantly increased at 48 hpi with *B. graminis*. Hence, pathogen-induced  
378 SUR1 accumulation is absent in response to *G. orontii* infection. This finding is in line  
379 with the observed absence of 4MOI3M accumulation despite pathogen-induced  
380 accumulation of CYP83B1 and CYP81F2, and supports the idea that the indole core  
381 structure synthesis pathway is aborted.

## 382 Discussion

383

### 384 The potential role of *PEN2* in post-invasive growth of adapted powdery mildews

385 Indole GLS-producing plants control numerous non-adapted and adapted plant  
386 pathogens via highly coordinated *PEN2*-mediated generation of toxic 4MOI3M  
387 hydrolysis products. Both pathogens used in this study have previously been shown  
388 to induce 4MOI3M accumulation, indicating increased flux from I3M to the *PEN2*  
389 substrate 4MOI3M (Pawel Bednarek et al., 2009; Schön et al., 2013). Accordingly,  
390 expression of *CYP81F2* – the key enzyme for 4MOI3M synthesis – has been shown  
391 to be induced by both pathogens (Fuchs et al., 2016; Schön et al., 2013). However,  
392 *pen2-1* mutants were reported to be only impaired in non-host penetration resistance  
393 e.g. to incompatible interaction with *B. graminis*, as entry of virulent *G. orontii* was not  
394 affected at 24 hpi (Lipka et al., 2005). Nevertheless, we found that *G. orontii* displays  
395 significantly increased sporulation on *pen2-1* that was indistinguishable from that on  
396 *eds1-2* (Fig. 2a). This finding indicates that *PEN2* is required to restrict post-invasive  
397 growth of *G. orontii*, which might be explained by a metabolic cost to detoxify products  
398 of *PEN2* hydrolysis. Alternatively, *PEN2* hydrolysis products might also react with  
399 endogenous plant compounds (e.g. amino acids) and thereby hamper the assimilatory  
400 process of the intruder. Furthermore, our results confirm that *pen2-1* mutants display  
401 enhanced *B. graminis* entry rates (Fig. 2b) (Lipka et al., 2005).

402

### 403 Cell-autonomous induction of GLS biosynthesis upon attack

404 This study investigated the origin of I3M – the 4MOI3M precursor and substrate of the  
405 *CYP81F2/PEN2* pathway – during the interaction of Arabidopsis with the powdery  
406 mildews *B. graminis* and *G. orontii*. We were able to detect 4MOI3M accumulation at

407 both 24 hpi and 48 hpi with *B. graminis* (Fig. 4), despite the insignificance of CYP81F2  
408 induction at 48 hpi (Fig. 3), indicating that the observed trend of CYP81F2 induction  
409 at 48 hpi is sufficient for 4MOI3M accumulation. Our results suggest that I3M is *de*  
410 *novo* synthesized as revealed by induction of CYP83B1 and SUR1 accumulation in  
411 the epidermis upon attack by *B. graminis* (Fig. 3 and Fig. 5). Similar results were  
412 obtained following inoculation with the biotrophic oomycete *Hyaloperonospora*  
413 *arabidopsidis* (Fig. S6). Induction of core structure synthesis is supported by the  
414 previous finding that  $\gamma$ -glutamylcysteine synthase, which is the enzyme catalyzing the  
415 first committed step in the biosynthesis of glutathione that is the sulfur donor in indole  
416 GLS synthesis, is not required for constitutive GLS accumulation, but for induction of  
417 indole GLS upon herbivory feeding and fungal attack (Schlaeppli, Abou-Mansour,  
418 Buchala, & Mauch, 2010; Schlaeppli, Bodenhausen, Buchala, Mauch, & Reymond,  
419 2008).

420

#### 421 **Transport of GLS during powdery mildew infection**

422 In addition to the proposed cell-autonomous model for defence of epidermal cells  
423 against powdery mildews, multicellular defence systems might (co-)exist. Based on  
424 the vascular localization of GLS biosynthetic enzymes under normal growth  
425 conditions, one of our initial hypotheses was that core structure synthesis is induced  
426 in the vasculature upon attack and that I3M is subsequently transported to the attacked  
427 epidermal cells. This scenario would require signal transmission from epidermal cells  
428 to the sites of synthesis in the vasculature. Thereafter, GLS transport from vascular  
429 parenchyma cells in the phloem towards attacked epidermal cells might be facilitated  
430 by GTRs (Madsen *et al.*, 2014). Alternatively, GLS might follow the symplasmic route

431 via plasmodesmata (Ganusova & Burch-Smith, 2019) or be delivered via a  
432 combination of transmembrane and symplasmic transport.

433 We hypothesized that the characterized GLS importers GTR1-3 could be involved in  
434 import into attacked epidermal cells and/or export from distant organs. In the former  
435 case, GTRs would have to be localized to epidermal cells challenged by powdery  
436 mildews. Microscopy revealed that accumulation of neither GTR1 nor GTR2 is  
437 significantly induced in attacked cells, indicating that these transporters are not  
438 involved in defence against powdery mildews (Fig. 1). As the *gtr1gtr2* and *gtr1gtr2gtr3*  
439 mutants showed the same phenotype as wild-type in penetration resistance and  
440 sporulation of *B. graminis* and *G. orontii*, respectively (Fig. 2), we can exclude that the  
441 transporters have effects during important stages of disease development (i.e. time  
442 points other than 24 hpi and 48 hpi) not tested by microscopy. Moreover, comparing  
443 *gtr1gtr2* and *gtr1gtr2gtr3* mutants allowed to exclude an additive role of GTR3.  
444 Furthermore, interorgan redistribution of GLS upon attack such as e.g. enhanced root-  
445 to-shoot GLS translocation via downregulation or inactivation of GTRs in the root can  
446 be excluded. Although GTR-mediated GLS transport is not relevant for defence  
447 against powdery mildews, it is possible that other unknown transport proteins are  
448 involved. Furthermore, we did not address the role of plasmodesmata-mediated  
449 symplasmic transport of GLS towards attacked cells. One benefit of symplasmic GLS  
450 transport might be that it is regulated by sink strength, while drawbacks include that  
451 open plasmodesmata also allow intercellular transport of nutrients, effectors and  
452 fungal toxins. However, a previous study demonstrated that recognition of the fungal  
453 elicitor chitin limits the molecular flux through plasmodesmata (Faulkner *et al.*, 2013).  
454 It is also noteworthy that powdery mildews exert pressure of 2-4 MPa during  
455 penetration (Micali, Göllner, Humphry, Consonni, & Panstruga, 2008; Tucker & Talbot,

456 2001). Independent of chitin perception, this pressure might be sufficient to trigger  
457 closure of plasmodesmata as demonstrated using pressure probes (Oparka & Prior,  
458 1992).

459

#### 460 **Remobilization of preformed GLS upon attack**

461 Yet another hypothesis that would not require *de novo* GLS synthesis relies on  
462 remobilization of preformed I3M. GLS accumulate in vacuoles assuming that findings  
463 obtained by immunolocalization of GLS in *Brassica napus* can be translated to  
464 Arabidopsis (Kelly, Bones, & Rossiter, 1998). In rosette leaves, GLS concentrations  
465 are highest in the epidermis, especially at the leaf margins, and in S-cell that are  
466 located at the phloem cap. Cell-autonomous release of preformed and intracellularly  
467 stored I3M would thus require a mechanism for export from the vacuole, while  
468 remobilization from distant storage sites such as the S-cell would additionally employ  
469 pathways such as GTR-mediated transmembrane or plasmodesmata-mediated  
470 symplasmic transport. Arguing against remobilization, we observed that I3M pools  
471 were not depleted upon attempted penetration, indicating that I3M is  
472 compartmentalized and not accessible to ER-anchored CYP81F2 and mitochondria-  
473 anchored PEN2 (Fig. 4). However, the data presented in this study cannot absolutely  
474 exclude a GLS remobilization. Identification of a putative vacuolar GLS exporter will  
475 enable to directly address whether remobilization plays a role in these interactions.

476

#### 477 **The role of indole GLS metabolism during PAMP-triggered immunity**

478 Our results demonstrate that accumulation of CYP83B1 and CYP81F2 is induced  
479 upon powdery mildew infection (Fig. 3). Analysis of indole GLS biosynthesis gene  
480 expression revealed that *CYP81F2* is also highly induced by chitin, while *CYP83B1*

481 and other genes encoding for enzymes in the indole GLS core structure pathway are  
482 not (Fig. S4). In addition, expression of the methyltransferases *IGMT1* and *IGMT2*,  
483 which catalyze 4-methoxylation of 4OH13M, are highly induced upon chitin treatment  
484 (Fig. S4), indicating that side chain modification, but not core structure synthesis of  
485 13M are elicited by chitin. In line with this finding, other studies suggested that only 4-  
486 substitution, but not *de novo* 13M synthesis is induced during plant-pathogen  
487 interactions (Pawel Bednarek et al., 2009; Iven et al., 2012). Our results using  
488 fluorophore-tagged proteins and live-cell microscopy contradict these earlier findings  
489 (Fig. 3 and Fig. 5). The results obtained in this study might be explained  
490 methodologically. Here, we utilized fluorophore-tagged protein fusions and thus  
491 collected data reflecting the protein level as compared to earlier studies that were  
492 investigating transcript abundance. It is feasible that enzymes involved in *de novo* 13M  
493 synthesis are regulated at the post-transcriptional level, while those required for side  
494 chain modifications are regulated transcriptionally. Furthermore, these earlier  
495 approaches might have been limited by the detection limit. Our results show that  
496 accumulation of core structure synthesis enzymes is not induced as high as those  
497 required for side chain modifications. Moreover, as only a subgroup of epidermal cells  
498 is attacked, the measurement of transcripts in whole leaves might not be able to  
499 resolve the induction of core structure synthesis enzymes. Similarly, the indole GLS  
500 concentration is supposedly solely induced in attacked epidermal cells. Hence,  
501 analysis of GLS or transcripts in whole leaves might be extremely diluted. We tried to  
502 overcome this issue by saturating the response using high numbers of conidiospores  
503 for inoculations. However, although the changes in GLS levels were significant, only  
504 slight differences were detected (Fig. 4). In regard to the massive induction of  
505 CYP81F2 (Fig. 3), the slight but significant changes of GLS indicate that the response

506 is highly diluted, demonstrating that live-cell microscopy is a superior method to detect  
507 cell-autonomous processes and that pathogen-induced events might be masked in  
508 most transcriptomics, metabolomics and proteomics studies. The transcriptome of  
509 laser-capture microdissected haustorial complexes formed by *G. orontii* in Arabidopsis  
510 epidermal cells has been reported, but was able to detect only slight induction of indole  
511 GLS synthetic enzymes at 5 dpi (Chandran, Inada, Hather, Kleindt, & Wildermuth,  
512 2010). In this study, the authors concluded that indole GLS synthesis might be delayed  
513 during the compatible interactions with *G. orontii* and that this delay might determine  
514 the compatibility. This finding is consistent with our result that 4MOI3M accumulates  
515 at 24 hpi and 48 hpi with *B. graminis*, but not *G. orontii* (Fig. 4). It is possible that  
516 4MOI3M accumulates at later stages of infection with *G. orontii*, which would be in  
517 accordance with the effect of PEN2 during post-, but not pre-invasive growth of *G.*  
518 *orontii* (Fig. 2).

519

### 520 ***SUR1* as a potential powdery mildew effector target**

521 Despite induced accumulation of both CYP83B1 and CYP81F2 during the interaction  
522 with *B. graminis* and *G. orontii*, 4MOI3M accumulates solely in response to *B.*  
523 *graminis*, suggesting that the indole GLS biosynthetic pathway is targeted by effectors  
524 of *G. orontii* (Fig. 3 and Fig. 4). Using CLSM, we show that induction of SUR1-mVenus  
525 accumulation is absent at 24 hpi and 48 hpi with *G. orontii*, but not with *B. graminis*  
526 (Fig. 5), indicating that SUR1 accumulation is repressed by *G. orontii*. It is also  
527 possible that SUR1 accumulation is not entirely absent during infection, but present at  
528 later stages of infection and thus only delayed. *SUR1* represents an optimal effector  
529 target due to the reported abortion of the indole GLS synthesis pathway in its absence.  
530 In absence of SUR1, S-alkyl-thiohydroximate will spontaneously and irreversibly

531 cyclize (Geu-Flores et al., 2009, 2011; Mikkelsen et al., 2004). Furthermore, *SUR1*  
532 has no homologues and loss of *SUR1* function displays the most severe phenotype of  
533 all GLS biosynthetic enzymes as it results in seedling lethality due to auxin  
534 overaccumulation (Boerjan et al., 1995; Mikkelsen et al., 2004). By targeting *SUR1* via  
535 an effector, *G. orontii* might thus additionally profit from auxin overaccumulation, which  
536 results in loosening of the cell wall that in turn facilitates penetration (Dünser & Kleine-  
537 Vehn, 2015). Interestingly, *SUR1* is the only core structure pathway enzyme that  
538 represents a target for endogenous miRNA (Kong, Li, Zhang, Jin, & Li, 2015).  
539 Targeting *SUR1* might thus be a straight-forward mechanism to regulate indole GLS  
540 synthesis and potentially also auxin synthesis that might be more advantageous as  
541 compared to non-selective regulation of all enzymes in the pathway via transcription  
542 factors such as *MYB34*, *MYB51* and *MYB122* (Frerigmann & Gigolashvili, 2014).  
543 Future studies should be directed towards identification and characterization of the  
544 hypothesized *G. orontii* effector and the role of the GLS core structure biosynthesis  
545 pathway as a potential breeding target for plant resistance of *Brassicaceae* crops.



546 **Accession numbers:**

547 *CYP81F2* (AT5G57220); *CYP83A1* (AT4G13770); *CYP83B1/SUR2* (AT4G31500);  
548 *EDR1* (AT1G08720); *EDS1* (AT3G48090); *NPF2.9/GTR3* (AT1G18880);  
549 *NPF2.10/GTR1* (AT3G47960); *NPF2.11/GTR2* (AT5G62680); *PEN2* (AT2G44490);  
550 *SUR1* (AT2G20610)

551

552 **Supporting Information:**

553 **Figure S1:** Tagged glucosinolate biosynthetic enzymes and transporters localize to  
554 cells of the vasculature under normal growth conditions.

555 **Figure S2:** Quantification of mean fluorescence intensities of GTR1-YFP and GTR2-  
556 mOrange2 following mock-treatment or inoculation with *B. graminis* or *G. orontii*.

557 **Figure S3:** Autofluorescence controls.

558 **Figure S4:** Transcripts abundance of indole GLS core structure synthesis and side  
559 chain modification in response to chitin as determined by microarray analysis.

560 **Figure S5:** Accumulation of aliphatic glucosinolates in wild-type and *cyp81f2* knock-  
561 out plants upon mock-, *B. graminis* and *G. orontii* treatment.

562 **Figure S6:** Cell-autonomous induction of *CYP83B1* and *CYP81F2* in response to  
563 *Hyaloperonospora arabidopsidis* infection.

564 **Appendix S1:** ANOVA results

## 565 References

- 566 Aarts, N., Metz, M., Holub, E., Staskawicz, B. J., Daniels, M. J. & Parker, J. E.  
567 (1998). Different requirements for EDS1 and NDR1 by disease resistance  
568 genes define at least two R gene-mediated signaling pathways in Arabidopsis.  
569 *Proceedings of the National Academy of Sciences of the United States of*  
570 *America*, 95(17), 10306–10311. doi:10.1073/pnas.95.17.10306
- 571 Agerbirk, N., De Vos, M., Kim, J. H., & Jander, G. (2009). Indole glucosinolate  
572 breakdown and its biological effects. *Phytochemistry reviews : proceedings of*  
573 *the Phytochemical Society of Europe*, 8(1), 101–120. doi:10.1007/s11101-  
574 008-9098-0
- 575 Andersen, T. G., & Halkier, B. A. (2014). Upon bolting the GTR1 and GTR2  
576 transporters mediate transport of glucosinolates to the inflorescence rather  
577 than roots. *Plant Signaling & Behavior*, 9(1), e27740. doi:10.4161/psb.27740
- 578 Andersen, T. G., Nour-Eldin, H. H., Fuller, V. L., Olsen, C. E., Burow, M., & Halkier,  
579 B. A. (2013). Integration of biosynthesis and long-distance transport establish  
580 organ-specific glucosinolate profiles in vegetative Arabidopsis. *The Plant Cell*,  
581 25(8), 3133–3145. doi:10.1105/tpc.113.110890
- 582 Bednarek, Pawel, Pislewska-Bednarek, M., Svatos, A., Schneider, B., Doubtsky, J.,  
583 Mansurova, M., ... Schulze-Lefert, P. (2009). A glucosinolate metabolism  
584 pathway in living plant cells mediates broad-spectrum antifungal defense.  
585 *Science*, 323(5910), 101–106. doi:10.1126/science.1163732
- 586 Bednarek, Paweł, Piślewska-Bednarek, M., Ver Loren van Themaat, E., Maddula, R.  
587 K., Svatoš, A., & Schulze-Lefert, P. (2011). Conservation and clade-specific  
588 diversification of pathogen-inducible tryptophan and indole glucosinolate  
589 metabolism in Arabidopsis thaliana relatives. *The New Phytologist*, 192(3),  
590 713–726. doi:10.1111/j.1469-8137.2011.03824.x
- 591 Boerjan, W., Cervera, M. T., Delarue, M., Beeckman, T., Dewitte, W., Bellini, C., ...  
592 Inzé, D. (1995). Superroot, a recessive mutation in Arabidopsis, confers auxin  
593 overproduction. *The Plant Cell*, 7(9), 1405–1419.
- 594 Burow, M., Zhang, Z.-Y., Ober, J. A., Lambrix, V. M., Wittstock, U., Gershenzon, J.,  
595 & Kleibenstein, D. J. (2008). ESP and ESM1 mediate indol-3-acetonitrile  
596 production from indol-3-ylmethyl glucosinolate in Arabidopsis. *Phytochemistry*,  
597 69(3), 663–671. doi:10.1016/j.phytochem.2007.08.027
- 598 Chandran, D., Inada, N., Hather, G., Kleindt, C. K., & Wildermuth, M. C. (2010).  
599 Laser microdissection of Arabidopsis cells at the powdery mildew infection  
600 site reveals site-specific processes and regulators. *Proceedings of the*  
601 *National Academy of Sciences of the United States of America*, 107(1), 460–  
602 465. doi:10.1073/pnas.0912492107
- 603 Crocoll, C., Halkier, B. A., & Burow, M. (2016). *Analysis and quantification of*  
604 *glucosinolates*. (Vol. 1, pp. 385–409). doi:10.1002/cppb.20027
- 605 Dünser, K., & Kleine-Vehn, J. (2015). Differential growth regulation in plants--the  
606 acid growth balloon theory. *Current Opinion in Plant Biology*, 28, 55–59.  
607 doi:10.1016/j.pbi.2015.08.009
- 608 Faulkner, C., Petutschnig, E., Benitez-Alfonso, Y., Beck, M., Robatzek, S., Lipka, V.,  
609 & Maule, A. J. (2013). LYM2-dependent chitin perception limits molecular flux  
610 via plasmodesmata. *Proceedings of the National Academy of Sciences of the*  
611 *United States of America*, 110(22), 9166–9170.  
612 doi:10.1073/pnas.1203458110

- 613 Frerigmann, H., & Gigolashvili, T. (2014). MYB34, MYB51, and MYB122 distinctly  
614 regulate indolic glucosinolate biosynthesis in *Arabidopsis thaliana*. *Molecular*  
615 *Plant*, 7(5), 814–828. doi:10.1093/mp/ssu004
- 616 Frye, C. A., & Innes, R. W. (1998). An *Arabidopsis* mutant with enhanced resistance  
617 to powdery mildew. *The Plant Cell*, 10(6), 947–956.
- 618 Fuchs, R., Kopsischke, M., Klapprodt, C., Hause, G., Meyer, A. J., Schwarzländer, M.,  
619 ... Lipka, V. (2016). Immobilized Subpopulations of Leaf Epidermal  
620 Mitochondria Mediate PENETRATION2-Dependent Pathogen Entry Control in  
621 *Arabidopsis*. *The Plant Cell*, 28(1), 130–145. doi:10.1105/tpc.15.00887
- 622 Ganusova, E. E., & Burch-Smith, T. M. (2019). Review: Plant-pathogen interactions  
623 through the plasmodesma prism. *Plant Science*, 279, 70–80.  
624 doi:10.1016/j.plantsci.2018.05.017
- 625 Geu-Flores, F., Møldrup, M. E., Böttcher, C., Olsen, C. E., Scheel, D., & Halkier, B.  
626 A. (2011). Cytosolic  $\gamma$ -glutamyl peptidases process glutathione conjugates in  
627 the biosynthesis of glucosinolates and camalexin in *Arabidopsis*. *The Plant*  
628 *Cell*, 23(6), 2456–2469. doi:10.1105/tpc.111.083998
- 629 Geu-Flores, F., Nielsen, M. T., Nafisi, M., Møldrup, M. E., Olsen, C. E., Motawia, M.  
630 S., & Halkier, B. A. (2009). Glucosinolate engineering identifies a gamma-  
631 glutamyl peptidase. *Nature Chemical Biology*, 5(8), 575–577.  
632 doi:10.1038/nchembio.185
- 633 Grubb, C. D., & Abel, S. (2006). Glucosinolate metabolism and its control. *Trends in*  
634 *Plant Science*, 11(2), 89–100. doi:10.1016/j.tplants.2005.12.006
- 635 Halkier, B. A., & Gershenzon, J. (2006). Biology and biochemistry of glucosinolates.  
636 *Annual review of plant biology*, 57, 303–333.  
637 doi:10.1146/annurev.arplant.57.032905.105228
- 638 Hematy, K., Lim, M., Cherk, C., Bednarek, P., Pislewski-Bednarek, M., Sanchez-  
639 Rodriguez, C., ... Somerville, S. (2019). *Arabidopsis* phytochelatin synthase  
640 1, but not phytochelatin synthesis, functions in extracellular defense against  
641 multiple fungal pathogens. *BioRxiv*. doi:10.1101/568113
- 642 Hunziker, P., Halkier, B. A., & Schulz, A. (2019). Glucosinolate storage cells in  
643 *Arabidopsis* transform into phloem fibres at late stages of development.  
644 *Journal of Experimental Botany*.
- 645 Iven, T., König, S., Singh, S., Braus-Stromeyer, S. A., Bischoff, M., Tietze, L. F., ...  
646 Dröge-Laser, W. (2012). Transcriptional activation and production of  
647 tryptophan-derived secondary metabolites in *arabidopsis* roots contributes to  
648 the defense against the fungal vascular pathogen *Verticillium longisporum*.  
649 *Molecular Plant*, 5(6), 1389–1402. doi:10.1093/mp/sss044
- 650 Jensen, L. M., Jepsen, H. S. K., Halkier, B. A., Kliebenstein, D. J., & Burow, M.  
651 (2015). Natural variation in cross-talk between glucosinolates and onset of  
652 flowering in *Arabidopsis*. *Frontiers in plant science*, 6, 697.  
653 doi:10.3389/fpls.2015.00697
- 654 Jørgensen, M. E., Xu, D., Crocoll, C., Ernst, H. A., Ramírez, D., Motawia, M. S., ...  
655 Halkier, B. A. (2017). Origin and evolution of transporter substrate specificity  
656 within the NPF family. *eLife*, 6. doi:10.7554/eLife.19466
- 657 Kelly, P. J., Bones, A., & Rossiter, J. T. (1998). Sub-cellular immunolocalization of  
658 the glucosinolate sinigrin in seedlings of *Brassica juncea*. *Planta*, 206(3), 370–  
659 377. doi:10.1007/s004250050412
- 660 Kim, J. H., Lee, B. W., Schroeder, F. C., & Jander, G. (2008). Identification of indole  
661 glucosinolate breakdown products with antifeedant effects on *Myzus persicae*

- 662 (green peach aphid). *The Plant Journal: for Cell and Molecular Biology*, 54(6),  
663 1015–1026. doi:10.1111/j.1365-313X.2008.03476.x
- 664 Kong, W., Li, Y., Zhang, M., Jin, F., & Li, J. (2015). A Novel Arabidopsis microRNA  
665 promotes IAA biosynthesis via the indole-3-acetaldoxime pathway by  
666 suppressing superroot1. *Plant & Cell Physiology*, 56(4), 715–726.  
667 doi:10.1093/pcp/pcu216
- 668 Koroleva, O A, Davies, A., Deeken, R., Thorpe, M. R., Tomos, A. D., & Hedrich, R.  
669 (2000). Identification of a new glucosinolate-rich cell type in Arabidopsis  
670 flower stalk. *Plant Physiology*, 124(2), 599–608.
- 671 Koroleva, Olga A, Gibson, T. M., Cramer, R., & Stain, C. (2010). Glucosinolate-  
672 accumulating S-cells in Arabidopsis leaves and flower stalks undergo  
673 programmed cell death at early stages of differentiation. *The Plant Journal: for  
674 Cell and Molecular Biology*, 64(3), 456–469. doi:10.1111/j.1365-  
675 313X.2010.04339.x
- 676 Lipka, V., Dittgen, J., Bednarek, P., Bhat, R., Wiermer, M., Stein, M., ... Schulze-  
677 Lefert, P. (2005). Pre- and postinvasion defenses both contribute to nonhost  
678 resistance in Arabidopsis. *Science*, 310(5751), 1180–1183.  
679 doi:10.1126/science.1119409
- 680 Madsen, S. R., Kunert, G., Reichelt, M., Gershenzon, J., & Halkier, B. A. (2015).  
681 Feeding on Leaves of the Glucosinolate Transporter Mutant *gtr1gtr2* Reduces  
682 Fitness of *Myzus persicae*. *Journal of Chemical Ecology*, 41(11), 975–984.  
683 doi:10.1007/s10886-015-0641-3
- 684 Madsen, S. R., Olsen, C. E., Nour-Eldin, H. H., & Halkier, B. A. (2014). Elucidating  
685 the role of transport processes in leaf glucosinolate distribution. *Plant  
686 Physiology*, 166(3), 1450–1462. doi:10.1104/pp.114.246249
- 687 Matern, A., Böttcher, C., Eschen-Lippold, L., Westermann, B., Smolka, U., Döll, S.,  
688 ... Rosahl, S. (2019). A substrate of the ABC transporter PEN3 stimulates  
689 bacterial flagellin (*flg22*)-induced callose deposition in Arabidopsis thaliana.  
690 *The Journal of Biological Chemistry*. doi:10.1074/jbc.RA119.007676
- 691 Micali, C., Göllner, K., Humphry, M., Consonni, C., & Panstruga, R. (2008). The  
692 Powdery Mildew Disease of Arabidopsis: A Paradigm for the Interaction  
693 between Plants and Biotrophic Fungi. *The Arabidopsis book / American  
694 Society of Plant Biologists*, 6, e0115. doi:10.1199/tab.0115
- 695 Mikkelsen, M. D., Naur, P., & Halkier, B. A. (2004). Arabidopsis mutants in the C-S  
696 lyase of glucosinolate biosynthesis establish a critical role for indole-3-  
697 acetaldoxime in auxin homeostasis. *The Plant Journal: for Cell and Molecular  
698 Biology*, 37(5), 770–777. doi:10.1111/j.1365-313X.2004.02002.x
- 699 Naur, P., Petersen, B. L., Mikkelsen, M. D., Bak, S., Rasmussen, H., Olsen, C. E., &  
700 Halkier, B. A. (2003). CYP83A1 and CYP83B1, two nonredundant cytochrome  
701 P450 enzymes metabolizing oximes in the biosynthesis of glucosinolates in  
702 Arabidopsis. *Plant Physiology*, 133(1), 63–72. doi:10.1104/pp.102.019240
- 703 Nintemann, S. J., Hunziker, P., Andersen, T. G., Schulz, A., Burow, M., & Halkier, B.  
704 A. (2018). Localization of the glucosinolate biosynthetic enzymes reveals  
705 distinct spatial patterns for the biosynthesis of indole and aliphatic  
706 glucosinolates. *Physiologia Plantarum*, 163(2), 138–154.  
707 doi:10.1111/ppl.12672
- 708 Nour-Eldin, H. H., Andersen, T. G., Burow, M., Madsen, S. R., Jørgensen, M. E.,  
709 Olsen, C. E., ... Halkier, B. A. (2012). NRT/PTR transporters are essential for  
710 translocation of glucosinolate defence compounds to seeds. *Nature*,  
711 488(7412), 531–534. doi:10.1038/nature11285

- 712 Oparka, K. J., & Prior, D. A. M. (1992). Direct evidence for pressure-generated  
713 closure of plasmodesmata. *The Plant Journal*, 2(5), 741–750.  
714 doi:10.1111/j.1365-313X.1992.tb00143.x
- 715 Piślewska-Bednarek, M., Nakano, R. T., Hiruma, K., Pastorczyk, M., Sanchez-Vallet,  
716 A., Singkaravanit-Ogawa, S., ... Bednarek, P. (2018). Glutathione  
717 Transferase U13 Functions in Pathogen-Triggered Glucosinolate Metabolism.  
718 *Plant Physiology*, 176(1), 538–551. doi:10.1104/pp.17.01455
- 719 Schlaeppi, K., Abou-Mansour, E., Buchala, A., & Mauch, F. (2010). Disease  
720 resistance of Arabidopsis to *Phytophthora brassicae* is established by the  
721 sequential action of indole glucosinolates and camalexin. *The Plant Journal:  
722 for Cell and Molecular Biology*, 62(5), 840–851. doi:10.1111/j.1365-  
723 313X.2010.04197.x
- 724 Schlaeppi, K., Bodenhausen, N., Buchala, A., Mauch, F., & Reymond, P. (2008). The  
725 glutathione-deficient mutant *pad2-1* accumulates lower amounts of  
726 glucosinolates and is more susceptible to the insect herbivore *Spodoptera  
727 littoralis*. *The Plant Journal: for Cell and Molecular Biology*, 55(5), 774–786.  
728 doi:10.1111/j.1365-313X.2008.03545.x
- 729 Schön, M., Töller, A., Diezel, C., Roth, C., Westphal, L., Wiermer, M., & Somssich, I.  
730 E. (2013). Analyses of *wrky18 wrky40* plants reveal critical roles of SA/EDS1  
731 signaling and indole-glucosinolate biosynthesis for *Golovinomyces orontii*  
732 resistance and a loss-of resistance towards *Pseudomonas syringae* pv.  
733 *tomato AvrRPS4*. *Molecular Plant-Microbe Interactions*, 26(7), 758–767.  
734 doi:10.1094/MPMI-11-12-0265-R
- 735 Sønderby, I. E., Geu-Flores, F., & Halkier, B. A. (2010). Biosynthesis of  
736 glucosinolates--gene discovery and beyond. *Trends in Plant Science*, 15(5),  
737 283–290. doi:10.1016/j.tplants.2010.02.005
- 738 Svozil, J., Gruissem, W., & Baerenfaller, K. (2015). Proteasome targeting of proteins  
739 in Arabidopsis leaf mesophyll, epidermal and vascular tissues. *Frontiers in  
740 plant science*, 6, 376. doi:10.3389/fpls.2015.00376
- 741 Tucker, S. L., & Talbot, N. J. (2001). Surface attachment and pre-penetration stage  
742 development by plant pathogenic fungi. *Annual Review of Phytopathology*, 39,  
743 385–417. doi:10.1146/annurev.phyto.39.1.385
- 744 Wang, Y.-Y., & Tsay, Y.-F. (2011). Arabidopsis nitrate transporter NRT1.9 is  
745 important in phloem nitrate transport. *The Plant Cell*, 23(5), 1945–1957.  
746 doi:10.1105/tpc.111.083618
- 747 Xu, D., Hanschen, F. S., Witzel, K., Nintemann, S. J., Nour-Eldin, H. H., Schreiner,  
748 M., & Halkier, B. A. (2016). Rhizosecretion of stele-synthesized glucosinolates  
749 and their catabolites requires GTR-mediated import in Arabidopsis. *Journal of  
750 Experimental Botany*. doi:10.1093/jxb/erw355
- 751 Xu, J., Meng, J., Meng, X., Zhao, Y., Liu, J., Sun, T., ... Zhang, S. (2016). Pathogen-  
752 Responsive MPK3 and MPK6 Reprogram the Biosynthesis of Indole  
753 Glucosinolates and Their Derivatives in Arabidopsis Immunity. *The Plant Cell*,  
754 28(5), 1144–1162. doi:10.1105/tpc.15.00871  
755



756 **Figure legends:**

757

758 **Figure 1: GTR1-YFP and GTR2-mOrange2 do not accumulate in attacked**  
759 **epidermal cells.** Representative confocal micrographs of plants expressing *GTR1-*  
760 *YFP* or *GTR2-mOrange2* under the control of their native promoters at 24 hours post  
761 inoculation (hpi) and 48 hpi with *B. graminis* or *G. orontii* and following mock-treatment.  
762 All images represent z-projections through the adaxial epidermal cell layer. All images  
763 are overlays of YFP or mOrange2 fluorescence (yellow), chlorophyll autofluorescence  
764 (magenta) and calcofluor white staining (cyan). Scale bar = 50  $\mu$ m.

765

766 **Figure 2: GTR1, GTR2 and GTR3 are not involved in defence against *B. graminis***  
767 **and *G. orontii*.** (a) Reproduction of *G. orontii* on wild-type (Col-0), *edr1* (negative  
768 control), *eds1-2* (positive control), *pen2-1*, *gtr1gtr2*, *GTR1-YFP/gtr1gtr2*, *GTR2-*  
769 *mOrange2/gtr1gtr2* and *gtr1gtr2gtr3* at 12 dpi. Spore numbers were determined for 4-  
770 6 pools of five plants. Pooled data from three independent experiments are shown.  
771 Individual boxplots show median (center line), mean (cross), first quartile (lower  
772 hinge), third quartile (upper hinge), whiskers (extending 1.5 times the inter-quartile  
773 range) and possible outliers (circles). Letters indicate significant differences between  
774 genotypes as determined by two-way ANOVA ( $p < 0.001$ ) with Tukey HSD post-hoc  
775 test. (b) Penetration resistance of wild-type (Col-0), *pen2-1*, *gtr1gtr2*, *GTR1-*  
776 *YFP/gtr1gtr2*, *GTR2-mOrange2/gtr1gtr2* and *gtr1gtr2gtr3* towards *B. graminis* at 72  
777 hpi. Number of papillae, encased haustoria and cell death were scored for 100  
778 interaction sites on the 5<sup>th</sup> leaves of three individual plants per genotype. Pooled data  
779 from three independent experiments are shown. Letters indicate significant differences

780 between genotypes as determined by two-way ANOVA ( $p < 0.001$ ;  $n = 3$ ) with Tukey  
781 HSD post-hoc test.

782

783 **Figure 3: *B. graminis* and *G. orontii* induce markers for biosynthesis of indole  
784 glucosinolate core structure and side chain modification in attacked epidermal**

785 **cells.** (a) Representative confocal micrographs of transgenic plants expressing  
786 CYP83A1-YFP, CYP83B1-YFP and CYP81F2-RFP under the control of their native  
787 promoters at 24 hours post inoculation (hpi) and 48 hpi with *B. graminis* or *G. orontii*  
788 and following mock-treatment. All images represent z-projections through the adaxial  
789 epidermal cell layer. All images are overlays of YFP or RFP channels depicted in  
790 yellow, chlorophyll autofluorescence in magenta and calcofluor white staining in cyan.

791 Scale bar = 50  $\mu\text{m}$ . (b) Quantification of mean fluorescence intensities of CYP83A1-  
792 YFP, CYP83B1-YFP and CYP81F2-RFP following mock-treatment (MOCK) or  
793 inoculation with *B. graminis* (BGH) or *G. orontii* (GO) for 24 hpi (red boxes) and 48 hpi  
794 (blue boxes). Fluorescence was corrected by subtracting autofluorescence as  
795 determined in Col-0 plants (see Fig. S2). Results from three independent lines and  
796 three independent experiments were pooled for all genotypes except CYP81F2-RFP  
797 (only one line). Individual boxplots show median (center line), mean (cross), first  
798 quartile (lower hinge), third quartile (upper hinge), whiskers (extending 1.5 times the  
799 inter-quartile range) and possible outliers (circles). Values below each box indicate the  
800 number of observations. Letters indicate significant differences between treatment  $\times$   
801 timepoint interactions as determined by two-way ANOVA ( $p < 0.05$ ) with Tukey HSD  
802 post-hoc test.

803

804 **Figure 4: *B. graminis*, but not *G. orontii* triggers 4-methoxy-indol-3-ylmethyl**  
805 **glucosinolate accumulation.** Quantification of total indole, indol-3-ylmethyl (I3M), 1-  
806 methoxy-indol-3-ylmethyl (1MOI3M) and 4-methoxy-indol-3-ylmethyl (4MOI3M)  
807 glucosinolates in whole leaves of Col-0 (wild-type; WT) and *cyp81f2* mutant plants  
808 following mock-treatment (Mock) or inoculation with *B. graminis* (Bgh) or *G. orontii*  
809 (Go) for 24 hours (red boxes) and 48 hours (blue boxes). Total indole glucosinolates  
810 represent the sum of I3M, 1MOI3M and 4MOI3M. Pooled data from three independent  
811 experiments are shown. Individual boxplots show median (center line), mean (cross),  
812 first quartile (lower hinge), third quartile (upper hinge), whiskers (extending 1.5 times  
813 the inter-quartile range) and possible outliers (circles). Letters indicate significant  
814 differences between treatment × timepoint interactions as determined by two-way  
815 ANOVA ( $p < 0.05$ ;  $n = 30$ ) with Tukey HSD post-hoc test.

816

817 **Figure 5: SUR1-YFP accumulation is induced by *B. graminis*, but not by *G.***  
818 ***orontii*.** (a) Representative confocal micrographs of plants expressing SUR1-YFP  
819 under the control of their native promoters at 24 hours post inoculation (hpi) and 48  
820 hpi with *B. graminis* or *G. orontii* and following mock-treatment. All images represent  
821 z-projections through the adaxial epidermal cell layer. All images are overlays of YFP  
822 channel depicted in yellow, chlorophyll autofluorescence in magenta and calcofluor  
823 white staining in cyan. Scale bar = 50  $\mu\text{m}$ . (b) Quantification of mean fluorescence  
824 intensities of SUR1-YFP following mock-treatment (MOCK) or inoculation with *B.*  
825 *graminis* (BGH) or *G. orontii* (GO) for 24 hpi (red boxes) and 48 hpi (blue boxes).  
826 Fluorescence was corrected by subtracting autofluorescence as determined in Col-0  
827 plants (see Fig. S2). Results from three independent lines and three independent  
828 experiments were pooled. Individual boxplots show median (center line), mean



829 (cross), first quartile (lower hinge), third quartile (upper hinge), whiskers (extending  
830 1.5 times the inter-quartile range) and possible outliers (circles). Values below each  
831 box indicate the number of observations. Letters indicate significant differences  
832 between treatment × time point interactions as determined by two-way ANOVA  
833 ( $p < 0.05$ ) with Tukey HSD post-hoc test.  
834

## Figure 1

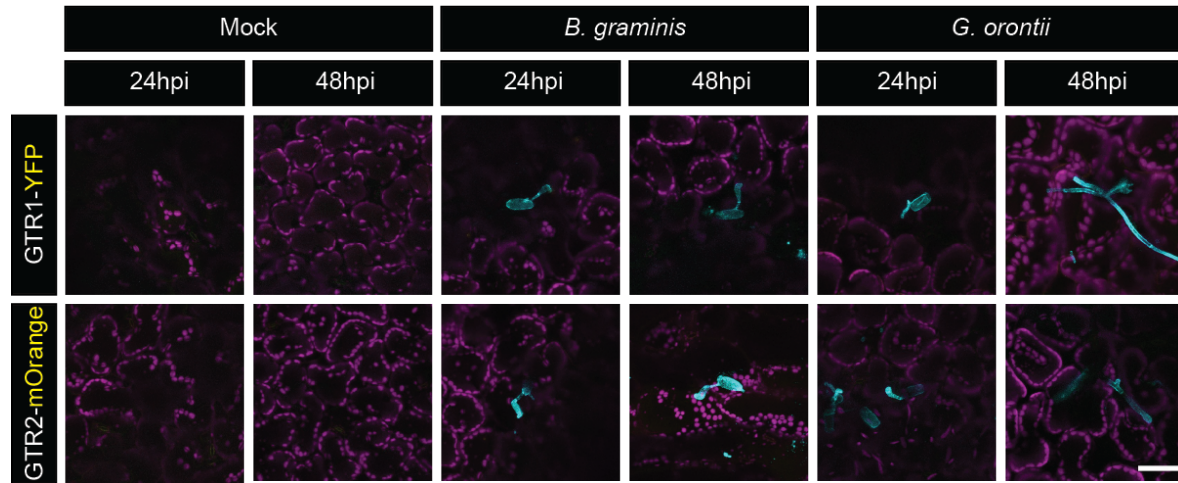

## Figure 2

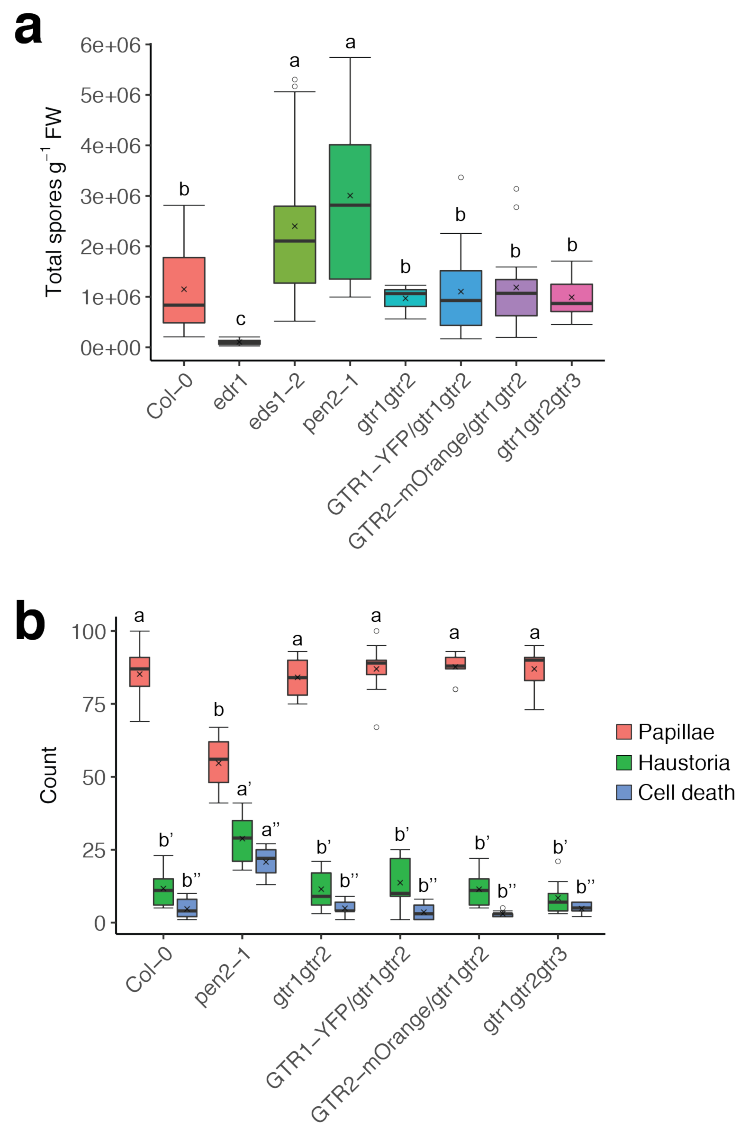

## Figure 3

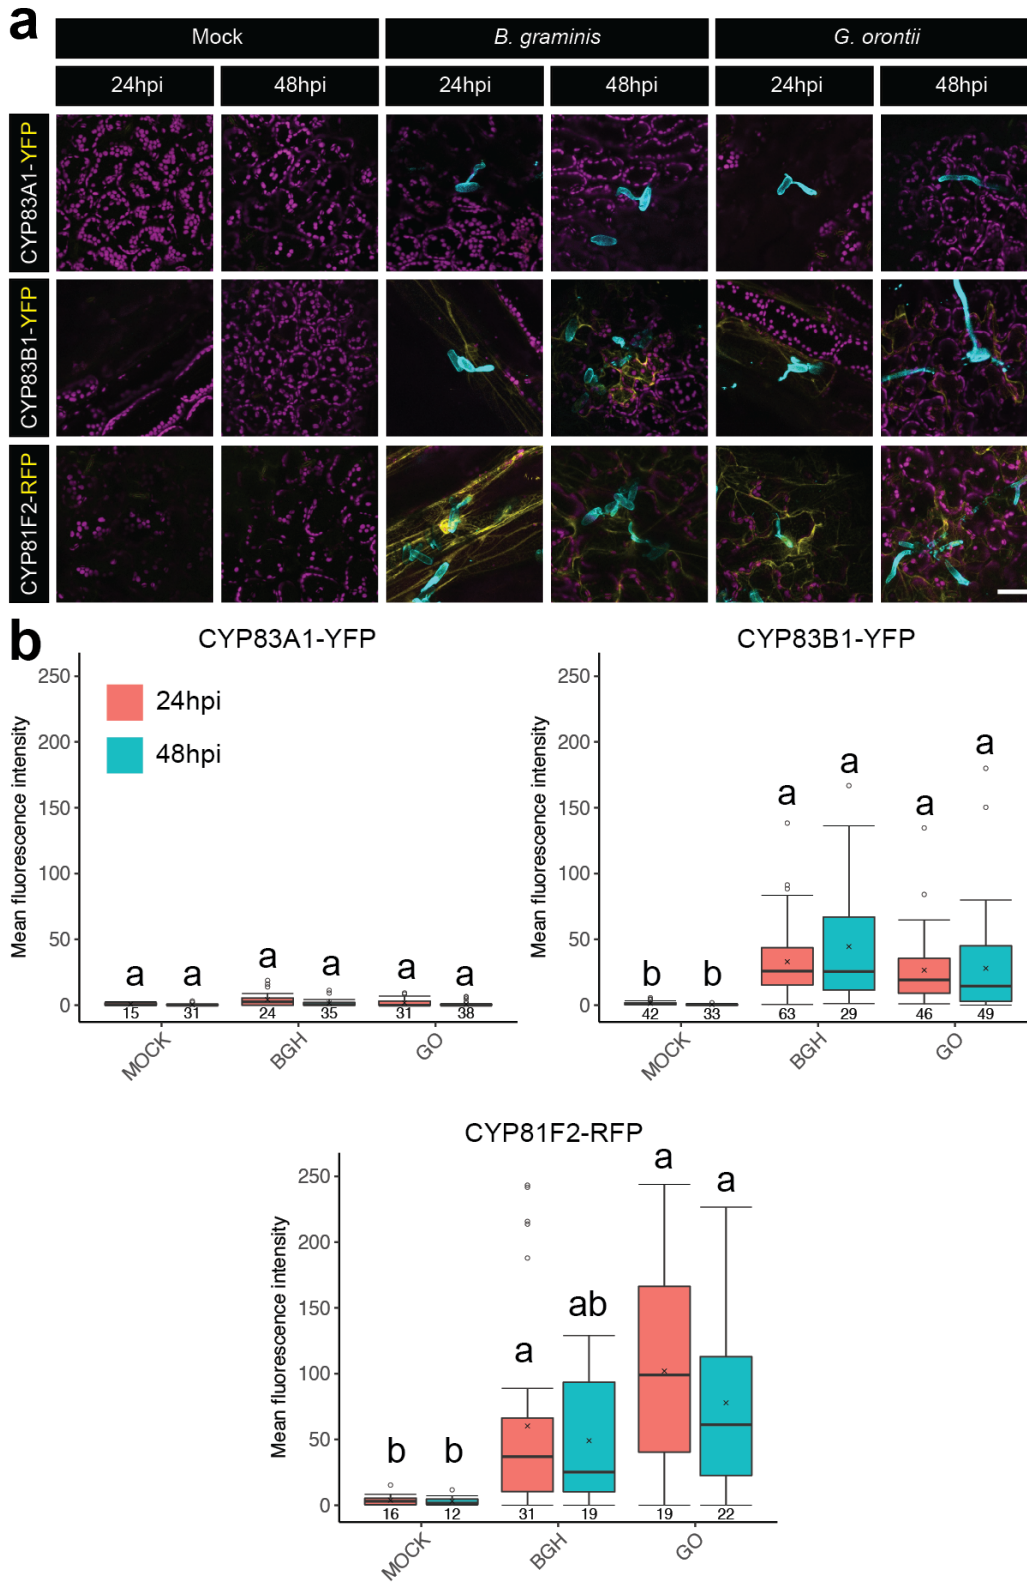

## Figure 4

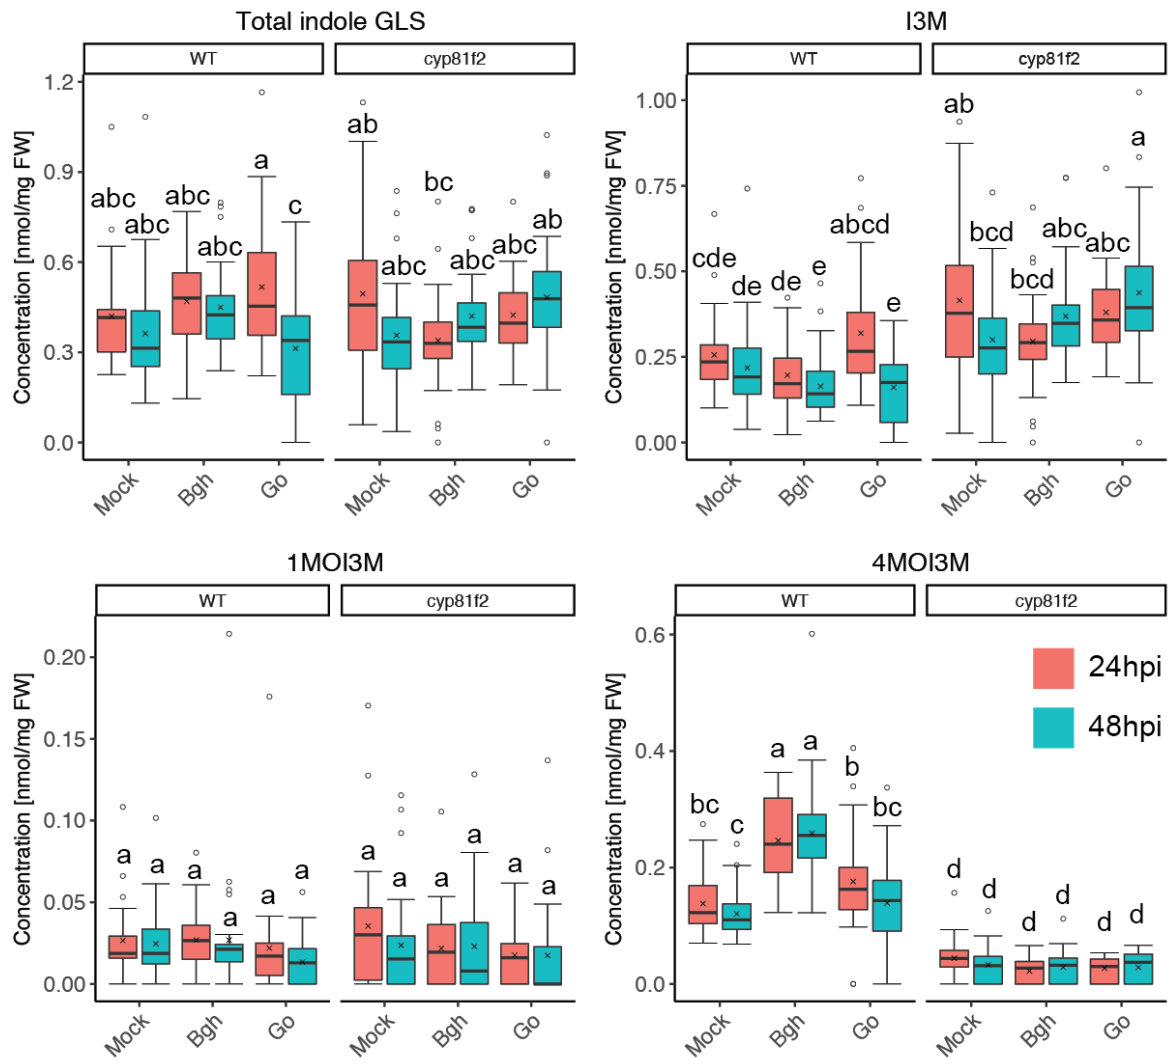

## Figure 5

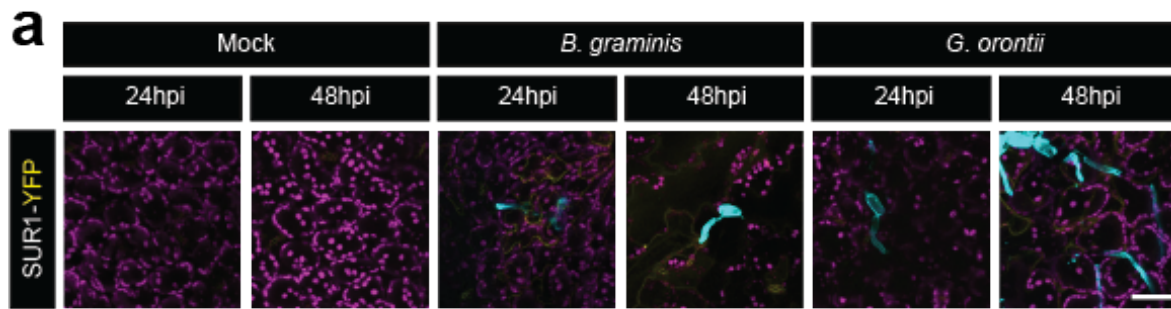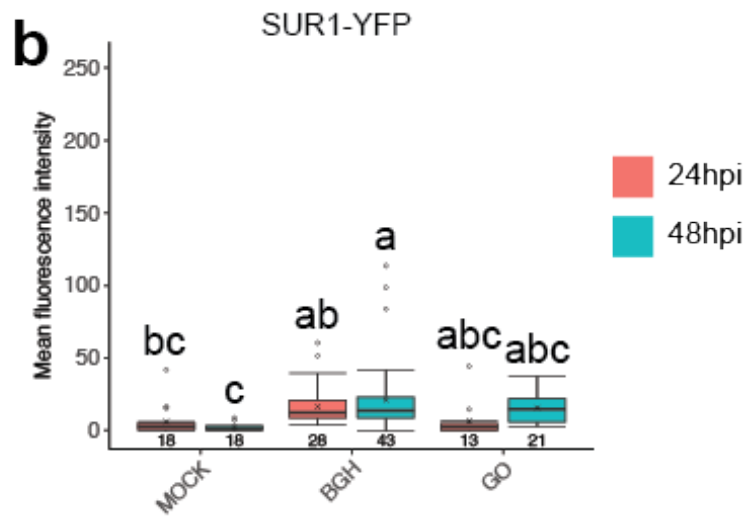

Source: https://www.biorxiv.org/content/biorxiv/early/2019/10/28/820720.full.pdf
